# Supplementary material for: Synthesis and characterization of ultralong La2O3:Eu3+ photoluminescent nanowires
Source: Royal Society of Chemistry journal article supplement (doi:10.1039/c1ra00136a), 2011-01-01
Supplement: c1ra00136a.pdf [file c1ra00136a.pdf]

## Electronic Supplementary Information

### Synthesis and characterization of ultralong $\text{La}_2\text{O}_3:\text{Eu}^{3+}$ photoluminescent nanowires

Tian Xia, <sup>\*a</sup> Jingping Wang, <sup>b</sup> Nan Lin, <sup>a</sup> Hui Zhao, <sup>a</sup> Lihua Huo, <sup>a</sup> and Grigoris Mountrichas <sup>c</sup>

*a* Key Laboratory of Functional Inorganic Materials Chemistry, Ministry of Education, School of Chemistry, Chemical Engineering and Materials, Heilongjiang University, Harbin 150080, P. R. China.

*b* College of Materials Science and Chemical Engineering, Harbin Engineering University, Harbin 150001, P. R. China.

*c* Theoretical and Physical Chemistry Institute, National Hellenic Research Center, Athens 11635, Greece.

## Figures

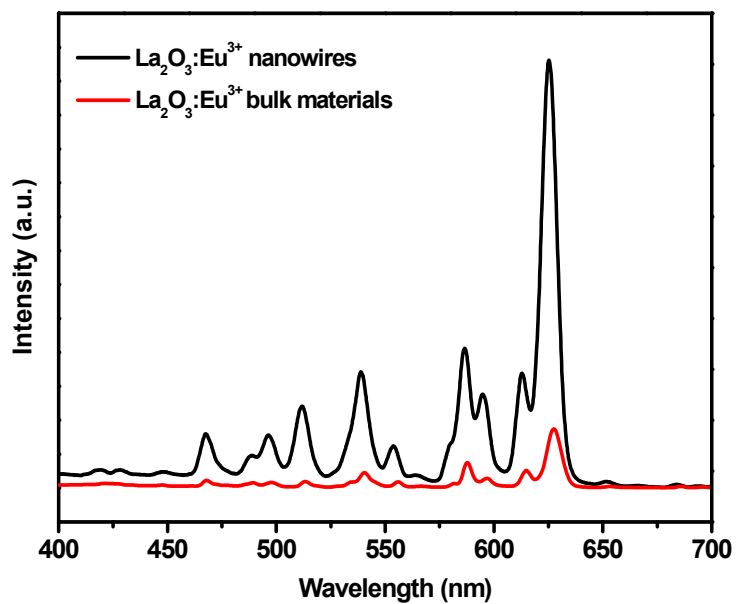

**Fig. S1** A comparison of PL emission spectra of ultralong La<sub>2</sub>O<sub>3</sub>:Eu<sup>3+</sup> nanowires with that of La<sub>2</sub>O<sub>3</sub>:Eu<sup>3+</sup> bulk materials under excitation at 282 nm.

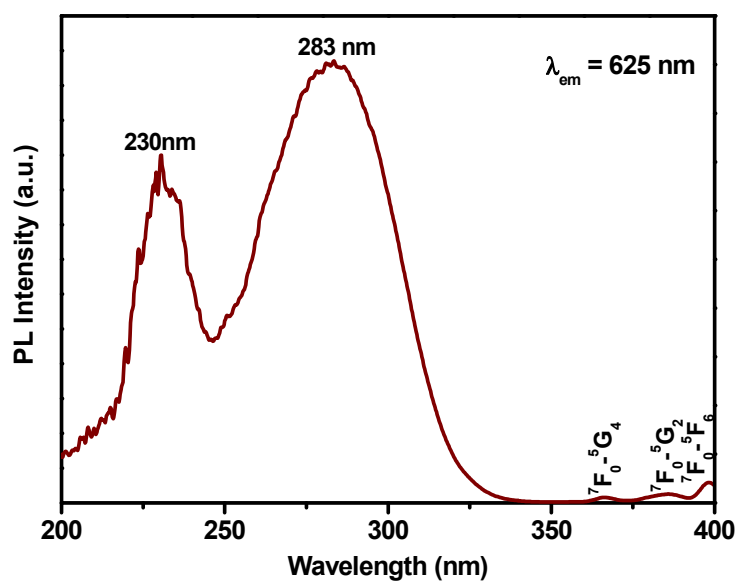

Fig. S2 Photoluminescence excitation spectra of La<sub>2</sub>O<sub>3</sub>:Eu<sup>3+</sup> nanowires.
